# Supplementary material for: An organic–inorganic hybrid K2TiF6 : Mn4+ red-emitting phosphor with remarkable improvement of emission and luminescent thermal stability
Source: Royal Society of Chemistry journal article supplement (doi:10.1039/d1ra08734g), 2022-01-01
Supplement: d1ra08734g1.pdf [file d1ra08734g1.pdf]

1  
2  
3  
4  
5  
6  
7  
8  
9  
10  
11  
12  
13  
14  
15  
16  
17  
18  
19  
20  
21  
22

## Supplementary materials

# Organic-inorganic hybrid $K_2TiF_6:Mn^{4+}$ red emitting phosphor with remarkable improvement of emission and thermal stability luminescent thermal stability

*Yan Yu<sup>a</sup>, Lin Wang<sup>a</sup>, Daishu Deng<sup>a</sup>, Xue Zhong<sup>a</sup>, Jiawei Qiang<sup>a</sup>,  
Tianman Wang<sup>a</sup>, Chunxiang Wu<sup>a</sup>, Sen Liao<sup>\*ab</sup>, Yingheng Huang<sup>\*a,b</sup>*

*<sup>a</sup> School of Chemistry and Chemical Engineering, Guangxi University, Nanning, Guangxi, 530004, China*

*<sup>b</sup> Guangxi Key Laboratory of Processing for Non-ferrous Metals and Featured Materials, School of Resources, Environment and Materials, Guangxi University, Nanning, Guangxi, 530004, China*

## 1 Experimental and methodology

### 1.1 Reagent and apparatus

Most chemicals were reagent-grade pure products purchased from the Sinopharm Chemical Reagent Co. Ltd., China. The crystal information of the powder samples was obtained by X-ray diffractometer (XRD) equipped with a graphite monochromator using Rigaku D/max 2500 V and monochromatic  $CuK\alpha$  radiation ( $\lambda=0.154178$  nm). A Hitachi S-3400 Scanning Electron Microscope (SEM) was used to obtain an image of the sample, and an additional energy dispersive X-ray spectrometer (EDS) was used to determine the elemental composition of the sample. A Horiba Fluoro Max-4-R F6000 spectrophotometer equipped with a xenon lamp as the excitation source was used to record the photoluminescence excitation and

1 emission spectra (PLE/PL) at room temperature. The luminescent decay curve and the  
2 photo luminescent quantum yield were obtained with an Edinburgh FLS980  
3 fluorescence spectrophotometer. The thermal analysis was performed in a NETZSCH  
4 STA 409 PC/PG thermogravimetric analyzer with a heating rate of 10 °C/min and  
5 pure nitrogen (99.999%) as a protective atmosphere with a flow rate of 20 ml/min.  
6 The performance of WLEDs was obtained using an auto-temperature LED opto-  
7 electronic analyser (LATA-1000, Everfine).

## 8 1.2 Preparation of samples

### 9 1.2.1 $K_2MnF_6$

10 Firstly, 4.5 g  $KMnO_4$  and 45 g  $KHF_2$  (99.5%) were dissolved in 150 mL HF (40%)  
11 solution. After stirring for 30 min, 3.2 mL (30%)  $H_2O_2$  was slowly added to the  
12 mixture. Subsequently, the deep purple solution gradually turned brown and a yellow  
13 precipitate is produced. Finally, it was washed several times with acetone and dried at  
14 70 °C for 2 h to obtain  $K_2MnF_6$  powder.

### 15 1.2.2 Commercial- $K_2TiF_6:0.06Mn^{4+}$ (CKTF: $Mn^{4+}$ )

16 Firstly, weigh 15 ml HF (40%) and 2.5 g  $KF \cdot 2H_2O$  into a plastic beaker and stir with  
17 a magnetic stirrer until the  $KF \cdot 2H_2O$  is completely dissolved. Then 1.5 mmol (0.37 g)  
18  $K_2MnF_6$  was added to the beaker and stirred for 30 min. 23.5 mmol (5.64 g) the  
19 purchased  $K_2TiF_6$  powder was added to the beaker and stirred for 30 min. Finally, the  
20 mixture was left for 24 h, washed with acetone several times, and dried at 70 °C for 3  
21 h to obtain sample (0) CKTF: $Mn^{4+}$ .

### 22 1.2.3 $K_2TiF_6$ (KTF)

1 Firstly, 225 mmol (31.10 g)  $K_2CO_3$ , and 32 ml  $H_2O$  were added to the plastic beaker  
2 and stirred for 30 min to obtain the mixed solution. Then, 225 mmol (73.74 g)  $H_2TiF_6$   
3 (50%) was slowly added to the plastic beaker and stirred to obtain the mixture. The  
4 mixture was ground with an agate mortar for 1 h. Finally, the mixture was dried at  
5 120 °C for 3 h to obtain KTF.

#### 6 1.2.4 $K_2TiF_6:0.06Mn^{4+}$ (KTF: $Mn^{4+}$ )

7 Firstly, 15 ml HF (40%) and 2.5 g  $KF \cdot 2H_2O$  were weighed and added to a plastic  
8 beaker and stirred with a magnetic stirrer until  $KF \cdot 2H_2O$  was completely dissolved.  
9 Then 1.5 mmol (0.37 g)  $K_2MnF_6$  was added to the beaker and stirred for 30 min. 23.5  
10 mmol (5.64 g) KTF powder was added to the beaker and stirred for 30 min. Finally,  
11 the mixture was allowed to stand for 24 h, washed several times with acetone and  
12 dried at 70 °C for 3 h to obtain sample (i) KTF: $Mn^{4+}$ .

#### 13 1.2.5 $K_2TiF_6:yHO(CH_2)_2NH_3^+$ (KTF: $yMEAH^+$ )

14 Firstly, 225 mmol (73.74 g)  $H_2TiF_6$  (50%) and 45 mmol (2.74 g)  $HO(CH_2)_2NH_2$   
15 (MEA) ( $y$  = molar ratio of MEA / Ti) were added to a plastic beaker on the one hand  
16 and stirred for 30 min to obtain a mixed solution (I). On the other hand to a plastic  
17 beaker 202.5 mmol (27.99 g)  $K_2CO_3$  and 32 ml  $H_2O$  were added to another plastic  
18 beaker and stirred for 30 min to obtain the mixed solution (II). Then the mixed  
19 solution (II) was slowly added to the mixed solution (I) and stirred to obtain the  
20 mixture. The mixture was ground with agate mortar for 1 h. Finally, the mixture was  
21 dried at 120 °C for 3 h to obtain KTF:0.1MEAH<sup>+</sup>. The synthesis steps of  
22 KTF: $yMEAH^+$  ( $y$  = 0.05-0.25) is the same as that of KTF:0.1TEAH<sup>+</sup>.

1 1.2.6  $\text{K}_2\text{TiF}_6:0.1\text{HO}(\text{CH}_2)_2\text{NH}_3^+,x\text{Mn}^{4+}$  ( $\text{KTF}:0.1\text{MEAH}^+,x\text{Mn}^{4+}$ )

2 Firstly, 15 ml HF (40%) and 2.5 g  $\text{KF}\cdot 2\text{H}_2\text{O}$  were weighed and added to a plastic  
3 beaker and stirred with a magnetic stirrer until  $\text{KF}\cdot 2\text{H}_2\text{O}$  was completely dissolved.  
4 Then 1.5 mmol (0.37 g)  $\text{K}_2\text{MnF}_6$  was added to the beaker and stirred for 30 min, and  
5 23.5 mmol (5.74 g)  $\text{KTF}:0.1\text{MEAH}^+$  powder ( $x = \text{molar ratio of Mn}/(\text{Mn}+\text{Ti}) = 0.06$ )  
6 was added to the beaker and stirred for 30 min. Finally, the mixture was allowed to  
7 stand for 24 h, washed several times with acetone and dried at 70 °C for 3 h to obtain  
8 sample (ii)  $\text{KTF}:0.1\text{MEAH}^+,0.06\text{Mn}^{4+}$  ( $\text{KTF}:\text{MEAH}^+,\text{Mn}^{4+}$ ).  $\text{KTF}:0.1\text{MEAH}^+,x\text{Mn}^{4+}$   
9 ( $x = 0.01-0.12$ ) samples were synthesized in the same way as  $\text{KTF}:\text{MEAH}^+,\text{Mn}^{4+}$ .

10 1.2.7  $\text{K}_2\text{TiF}_6:y\text{HO}(\text{CH}_2)_2\text{NH}_3^+,0.06\text{Mn}^{4+}$  ( $\text{KTF}:y\text{MEAH}^+,0.06\text{Mn}^{4+}$ )

11 Firstly, 15 ml HF (40%) and 2.5 g  $\text{KF}\cdot 2\text{H}_2\text{O}$  were weighed and added to a plastic  
12 beaker and stirred with a magnetic stirrer until  $\text{KF}\cdot 2\text{H}_2\text{O}$  was completely dissolved.  
13 Then 1.5 mmol (0.37 g)  $\text{K}_2\text{MnF}_6$  was added to the beaker and stirred for 30 min, and  
14 23.5 mmol (5.74 g)  $\text{KTF}:0.1\text{MEAH}^+$  powder ( $y = \text{molar ratio of MEA} / \text{Ti} = 0.1$ ) was  
15 added to the beaker and stirred for 30 min. Finally, the mixture was allowed to stand  
16 for 24 h, washed several times with acetone and dried at 70 °C for 3 h to obtain  
17  $\text{KTF}:0.1\text{MEAH}^+,0.06\text{Mn}^{4+}$ .  $\text{KTF}:y\text{MEAH}^+,0.06\text{Mn}^{4+}$  ( $y = 0.05-0.25$ ) samples were  
18 synthesized in the same way as  $\text{KTF}:0.1\text{MEAH}^+,0.06\text{Mn}^{4+}$ .

19 1.2.8 Assembly of Prototype WLEDs.

20 Mix  $\text{YAG}:\text{Ce}^{3+}$ ,  $\text{KTF}:\text{MEAH}^+,\text{Mn}^{4+}$  and epoxy resin (the mass ratio of the three is  
21 1.0:5.0:16) and the mixture is coated on the surface of InGaN chips to obtain  
22 prototypes of WLEDs.

## 1 2. Ninhydrin method detection

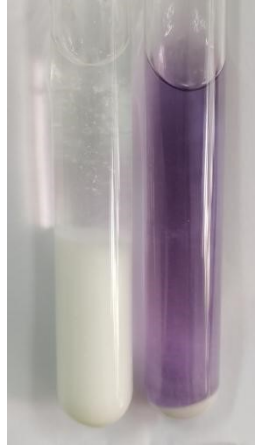

2

3 **Fig. S1** Photos of the reaction of KTF (left) and KTF:0.1MEA (right) with ninhydrin

4 in natural light.

5

## 6 3. Theoretical calculation

### 7 3.1 The internal quantum yield

8 The internal quantum yield of sample is calculated based on Eq. (S1).<sup>24-26</sup>

$$9 \quad QY_i = \frac{\int L_{emission}}{\int E_{blank} - \int E_{sample}}$$

10 (S1)

11 Where  $L_{emission}$  is the emission spectrum of the sample,  $E_{blank}$  and  $E_{sample}$  are the

12 spectra of excitation light without and with samples in the integrating sphere,

13 respectively.

### 14 3.2. Color purity

15 The color purity of sample is calculated based on Eq. (S2).<sup>27-29</sup>

$$16 \quad C_p = \frac{\sqrt{(x - x_i)^2 + (y - y_i)^2}}{\sqrt{(x_d - x_i)^2 + (y_d - y_i)^2}} \times 100\%$$

17 (S2)

1  $(x, y)$  is the chromaticity coordinate of the sample,  $(x_i, y_i)$  is the CIE value (0.33,  
 2 0.33) of the equal energy light source,  $(x_d, y_d)$  is the color coordinate corresponding to  
 3 the main wavelength of the light source (the chromaticity excited by 467 nm light)  
 4 The coordinates are:  $x_d = 0.1314, y_d = 0.0459$ ).

### 5 3.3. Critical distance ( $R_c$ )

6 The critical distance ( $R_c$ ) between  $Mn^{4+}$  ions is determined by using Eq. (S3).<sup>30</sup>

$$7 \quad R_c \approx 2 \left[ \frac{3V}{4\pi x_c N} \right]^{1/3} \quad (S3)$$

8 Here,  $V, x_c$  and  $N$  are the unit cell volume of the sample, the critical concentration  
 9 of  $Mn^{4+}$  and the number of sites that activators can substitute per unit, respectively.

### 10 3.4. Correlation type of multipolar interaction

11 The correlation type of multipolar interaction between  $Mn^{4+}$  among

12 KTF:0.1MEA, $xMn^{4+}$  using Eq. (S4).<sup>30,31</sup>

$$13 \quad \frac{I}{x} = k [1 + \beta(x)^{\theta/3}]^{-1} \quad (S4)$$

14 Where  $I$  is the PL intensity of the sample and  $x$  is the  $Mn^{4+}$  concentration greater  
 15 than  $x_c$ .  $\beta$  and  $k$  are constants for the same excitation conditions. When  $\theta$  is equal to 6,  
 16 8 and 10, it corresponds to the interaction mechanism of dipole-dipole, dipole-  
 17 quadrupole and quadrupole-quadrupole, respectively.

### 18 3.5. Chromaticity shift

19 The chromaticity shift ( $\Delta E$ ) at different temperatures was calculated using Eq.

20 (S5).<sup>39,40</sup>

$$21 \quad \Delta E = \sqrt{(u'_t - u'_0)^2 + (v'_t - v'_0)^2 + (w'_t + w'_0)^2} \quad (S5)$$

1 Where  $u' = 4x/(3 - 2x + 12y)$ ,  $v' = 9y/(3 - 2x + 12y)$  and  $w' = 1 - u' - v'$ .  $x$  and  $y$  are  
 2 the chromaticity coordinates,  $v'$  and  $u'$  are the chromaticity coordinates in the  $u' - v'$   
 3 uniform color space, and  $\theta$  and  $t$  are room temperature and a given temperature,  
 4 respectively.

### 5 3.6. Activation energy ( $E_a$ )

6 The Eq. (S6) is used to calculate  $E_a$  of samples (i)-(iii). Eq. (S6) can be transformed  
 7 into Eq. (S7), and  $E_a$  can be obtained from the slope in Eq. (S7).<sup>41,42</sup>

$$I_T = \frac{I_0}{1 + A \exp\left(-\frac{E_a}{k_B T}\right)}$$

8  
 9 (S6)

$$10 \quad \ln\left(\frac{I_0}{I_T} - 1\right) = \ln A - \frac{E_a}{k_B T} \quad (S7)$$

11 Among them,  $I_0$  and  $I_T$  are the initial emission intensity and the emission intensity  
 12 at a given temperature, respectively.  $A$  and  $k_B$  are the constant and Boltzmann's  
 13 constant ( $8.617 \times 10^{-5}$  eV/K), respectively.
